# Supplementary material
Source: MDPI journal article supplement (https://www.mdpi.com/2504-3129/3/1/6)
Supplement: s1 [file s1]

**Table S1** Periods with available data per sensor for two weeks from 3 July, 2019, to 16 July, 2019. C indicates the control, and N indicates the N-fertilized. Gray bands represent available periods.

**Table S2** Periods with available data per sensor for two weeks from 17 July, 2019, to 30 July, 2019. C indicates the control, and N indicates the N-fertilized. Gray bands mean available periods.

| Day |     | 17 | 18 | 19 | 20 | 21 | 22 | 23 | 24 | 25 | 26 | 27 | 28 | 29 | 30 |
|-----|-----|----|----|----|----|----|----|----|----|----|----|----|----|----|----|
| C   | #1  |    |    |    |    |    |    |    |    |    |    |    |    |    |    |
|     | #2  |    |    |    |    |    |    |    |    |    |    |    |    |    |    |
|     | #3  |    |    |    |    |    |    |    |    |    |    |    |    |    |    |
|     | #4  |    |    |    |    |    |    |    |    |    |    |    |    |    |    |
|     | #5  |    |    |    |    |    |    |    |    |    |    |    |    |    |    |
|     | #6  |    |    |    |    |    |    |    |    |    |    |    |    |    |    |
|     | #7  |    |    |    |    |    |    |    |    |    |    |    |    |    |    |
|     | #8  |    |    |    |    |    |    |    |    |    |    |    |    |    |    |
|     | #9  |    |    |    |    |    |    |    |    |    |    |    |    |    |    |
|     | #10 |    |    |    |    |    |    |    |    |    |    |    |    |    |    |
|     | #11 |    |    |    |    |    |    |    |    |    |    |    |    |    |    |
|     | #12 |    |    |    |    |    |    |    |    |    |    |    |    |    |    |
|     | #13 |    |    |    |    |    |    |    |    |    |    |    |    |    |    |
|     | #14 |    |    |    |    |    |    |    |    |    |    |    |    |    |    |
|     | #15 |    |    |    |    |    |    |    |    |    |    |    |    |    |    |
|     | #16 |    |    |    |    |    |    |    |    |    |    |    |    |    |    |
| N   | #1  |    |    |    |    |    |    |    |    |    |    |    |    |    |    |
|     | #2  |    |    |    |    |    |    |    |    |    |    |    |    |    |    |
|     | #3  |    |    |    |    |    |    |    |    |    |    |    |    |    |    |
|     | #4  |    |    |    |    |    |    |    |    |    |    |    |    |    |    |
|     | #5  |    |    |    |    |    |    |    |    |    |    |    |    |    |    |
|     | #6  |    |    |    |    |    |    |    |    |    |    |    |    |    |    |
|     | #7  |    |    |    |    |    |    |    |    |    |    |    |    |    |    |
|     | #8  |    |    |    |    |    |    |    |    |    |    |    |    |    |    |
|     | #9  |    |    |    |    |    |    |    |    |    |    |    |    |    |    |
|     | #10 |    |    |    |    |    |    |    |    |    |    |    |    |    |    |
|     | #11 |    |    |    |    |    |    |    |    |    |    |    |    |    |    |
|     | #12 |    |    |    |    |    |    |    |    |    |    |    |    |    |    |
|     | #13 |    |    |    |    |    |    |    |    |    |    |    |    |    |    |
|     | #14 |    |    |    |    |    |    |    |    |    |    |    |    |    |    |
|     | #15 |    |    |    |    |    |    |    |    |    |    |    |    |    |    |
|     | #16 |    |    |    |    |    |    |    |    |    |    |    |    |    |    |

**Table S3** Periods with available data per sensor for two weeks from 31 July, 2019, to 13 August, 2019. C indicates the control, and N indicates the N-fertilized. Gray bands mean available periods.

| Day |     | 31 | 1 | 2 | 3 | 4 | 5 | 6 | 7 | 8 | 9 | 10 | 11 | 12 | 13 |  |
|-----|-----|----|---|---|---|---|---|---|---|---|---|----|----|----|----|--|
| C   | #1  |    |   |   |   |   |   |   |   |   |   |    |    |    |    |  |
|     | #2  |    |   |   |   |   |   |   |   |   |   |    |    |    |    |  |
|     | #3  |    |   |   |   |   |   |   |   |   |   |    |    |    |    |  |
|     | #4  |    |   |   |   |   |   |   |   |   |   |    |    |    |    |  |
|     | #5  |    |   |   |   |   |   |   |   |   |   |    |    |    |    |  |
|     | #6  |    |   |   |   |   |   |   |   |   |   |    |    |    |    |  |
|     | #7  |    |   |   |   |   |   |   |   |   |   |    |    |    |    |  |
|     | #8  |    |   |   |   |   |   |   |   |   |   |    |    |    |    |  |
|     | #9  |    |   |   |   |   |   |   |   |   |   |    |    |    |    |  |
|     | #10 |    |   |   |   |   |   |   |   |   |   |    |    |    |    |  |
|     | #11 |    |   |   |   |   |   |   |   |   |   |    |    |    |    |  |
|     | #12 |    |   |   |   |   |   |   |   |   |   |    |    |    |    |  |
|     | #13 |    |   |   |   |   |   |   |   |   |   |    |    |    |    |  |
|     | #14 |    |   |   |   |   |   |   |   |   |   |    |    |    |    |  |
|     | #15 |    |   |   |   |   |   |   |   |   |   |    |    |    |    |  |
|     | #16 |    |   |   |   |   |   |   |   |   |   |    |    |    |    |  |
| N   | #1  |    |   |   |   |   |   |   |   |   |   |    |    |    |    |  |
|     | #2  |    |   |   |   |   |   |   |   |   |   |    |    |    |    |  |
|     | #3  |    |   |   |   |   |   |   |   |   |   |    |    |    |    |  |
|     | #4  |    |   |   |   |   |   |   |   |   |   |    |    |    |    |  |
|     | #5  |    |   |   |   |   |   |   |   |   |   |    |    |    |    |  |
|     | #6  |    |   |   |   |   |   |   |   |   |   |    |    |    |    |  |
|     | #7  |    |   |   |   |   |   |   |   |   |   |    |    |    |    |  |
|     | #8  |    |   |   |   |   |   |   |   |   |   |    |    |    |    |  |
|     | #9  |    |   |   |   |   |   |   |   |   |   |    |    |    |    |  |
|     | #10 |    |   |   |   |   |   |   |   |   |   |    |    |    |    |  |
|     | #11 |    |   |   |   |   |   |   |   |   |   |    |    |    |    |  |
|     | #12 |    |   |   |   |   |   |   |   |   |   |    |    |    |    |  |
|     | #13 |    |   |   |   |   |   |   |   |   |   |    |    |    |    |  |
|     | #14 |    |   |   |   |   |   |   |   |   |   |    |    |    |    |  |
|     | #15 |    |   |   |   |   |   |   |   |   |   |    |    |    |    |  |
|     | #16 |    |   |   |   |   |   |   |   |   |   |    |    |    |    |  |

**Table S4** Periods with available data per sensor for two weeks from 14 August, 2019, to 27 August, 2019. C indicates the control, and N indicates the N-fertilized. Gray bands mean available periods.

| Day |     | 14 | 15 | 16 | 17 | 18 | 19 | 20 | 21 | 22 | 23 | 24 | 25 | 26 | 27 |  |  |
|-----|-----|----|----|----|----|----|----|----|----|----|----|----|----|----|----|--|--|
| C   | #1  |    |    |    |    |    |    |    |    |    |    |    |    |    |    |  |  |
|     | #2  |    |    |    |    |    |    |    |    |    |    |    |    |    |    |  |  |
|     | #3  |    |    |    |    |    |    |    |    |    |    |    |    |    |    |  |  |
|     | #4  |    |    |    |    |    |    |    |    |    |    |    |    |    |    |  |  |
|     | #5  |    |    |    |    |    |    |    |    |    |    |    |    |    |    |  |  |
|     | #6  |    |    |    |    |    |    |    |    |    |    |    |    |    |    |  |  |
|     | #7  |    |    |    |    |    |    |    |    |    |    |    |    |    |    |  |  |
|     | #8  |    |    |    |    |    |    |    |    |    |    |    |    |    |    |  |  |
|     | #9  |    |    |    |    |    |    |    |    |    |    |    |    |    |    |  |  |
|     | #10 |    |    |    |    |    |    |    |    |    |    |    |    |    |    |  |  |
|     | #11 |    |    |    |    |    |    |    |    |    |    |    |    |    |    |  |  |
|     | #12 |    |    |    |    |    |    |    |    |    |    |    |    |    |    |  |  |
|     | #13 |    |    |    |    |    |    |    |    |    |    |    |    |    |    |  |  |
|     | #14 |    |    |    |    |    |    |    |    |    |    |    |    |    |    |  |  |
|     | #15 |    |    |    |    |    |    |    |    |    |    |    |    |    |    |  |  |
|     | #16 |    |    |    |    |    |    |    |    |    |    |    |    |    |    |  |  |
| N   | #1  |    |    |    |    |    |    |    |    |    |    |    |    |    |    |  |  |
|     | #2  |    |    |    |    |    |    |    |    |    |    |    |    |    |    |  |  |
|     | #3  |    |    |    |    |    |    |    |    |    |    |    |    |    |    |  |  |
|     | #4  |    |    |    |    |    |    |    |    |    |    |    |    |    |    |  |  |
|     | #5  |    |    |    |    |    |    |    |    |    |    |    |    |    |    |  |  |
|     | #6  |    |    |    |    |    |    |    |    |    |    |    |    |    |    |  |  |
|     | #7  |    |    |    |    |    |    |    |    |    |    |    |    |    |    |  |  |
|     | #8  |    |    |    |    |    |    |    |    |    |    |    |    |    |    |  |  |
|     | #9  |    |    |    |    |    |    |    |    |    |    |    |    |    |    |  |  |
|     | #10 |    |    |    |    |    |    |    |    |    |    |    |    |    |    |  |  |
|     | #11 |    |    |    |    |    |    |    |    |    |    |    |    |    |    |  |  |
|     | #12 |    |    |    |    |    |    |    |    |    |    |    |    |    |    |  |  |
|     | #13 |    |    |    |    |    |    |    |    |    |    |    |    |    |    |  |  |
|     | #14 |    |    |    |    |    |    |    |    |    |    |    |    |    |    |  |  |
|     | #15 |    |    |    |    |    |    |    |    |    |    |    |    |    |    |  |  |
|     | #16 |    |    |    |    |    |    |    |    |    |    |    |    |    |    |  |  |

C indicates the control, and N indicates the N-fertilized. Gray bands mean available periods.

| Day |     | 28 | 29 | 30 | 31 | 1 | 2 | 3 | 4 | 5 | 6 | 7 | 8 | 9 | 10 |
|-----|-----|----|----|----|----|---|---|---|---|---|---|---|---|---|----|
| C   | #1  |    |    |    |    |   |   |   |   |   |   |   |   |   |    |
|     | #2  |    |    |    |    |   |   |   |   |   |   |   |   |   |    |
|     | #3  |    |    |    |    |   |   |   |   |   |   |   |   |   |    |
|     | #4  |    |    |    |    |   |   |   |   |   |   |   |   |   |    |
|     | #5  |    |    |    |    |   |   |   |   |   |   |   |   |   |    |
|     | #6  |    |    |    |    |   |   |   |   |   |   |   |   |   |    |
|     | #7  |    |    |    |    |   |   |   |   |   |   |   |   |   |    |
|     | #8  |    |    |    |    |   |   |   |   |   |   |   |   |   |    |
|     | #9  |    |    |    |    |   |   |   |   |   |   |   |   |   |    |
|     | #10 |    |    |    |    |   |   |   |   |   |   |   |   |   |    |
|     | #11 |    |    |    |    |   |   |   |   |   |   |   |   |   |    |
|     | #12 |    |    |    |    |   |   |   |   |   |   |   |   |   |    |
|     | #13 |    |    |    |    |   |   |   |   |   |   |   |   |   |    |
|     | #14 |    |    |    |    |   |   |   |   |   |   |   |   |   |    |
|     | #15 |    |    |    |    |   |   |   |   |   |   |   |   |   |    |
|     | #16 |    |    |    |    |   |   |   |   |   |   |   |   |   |    |
| N   | #1  |    |    |    |    |   |   |   |   |   |   |   |   |   |    |
|     | #2  |    |    |    |    |   |   |   |   |   |   |   |   |   |    |
|     | #3  |    |    |    |    |   |   |   |   |   |   |   |   |   |    |
|     | #4  |    |    |    |    |   |   |   |   |   |   |   |   |   |    |
|     | #5  |    |    |    |    |   |   |   |   |   |   |   |   |   |    |
|     | #6  |    |    |    |    |   |   |   |   |   |   |   |   |   |    |
|     | #7  |    |    |    |    |   |   |   |   |   |   |   |   |   |    |
|     | #8  |    |    |    |    |   |   |   |   |   |   |   |   |   |    |
|     | #9  |    |    |    |    |   |   |   |   |   |   |   |   |   |    |
|     | #10 |    |    |    |    |   |   |   |   |   |   |   |   |   |    |
|     | #11 |    |    |    |    |   |   |   |   |   |   |   |   |   |    |
|     | #12 |    |    |    |    |   |   |   |   |   |   |   |   |   |    |
|     | #13 |    |    |    |    |   |   |   |   |   |   |   |   |   |    |
|     | #14 |    |    |    |    |   |   |   |   |   |   |   |   |   |    |
|     | #15 |    |    |    |    |   |   |   |   |   |   |   |   |   |    |
|     | #16 |    |    |    |    |   |   |   |   |   |   |   |   |   |    |

**Table S6** Periods with available data per sensor for two weeks from 11 September, 2019, to 24 September, 2019. C indicates the control, and N indicates the N-fertilized. Gray bands mean available periods.

| Day |     | 11 | 12 | 13 | 14 | 15 | 16 | 17 | 18 | 19 | 20 | 21 | 22 | 23 | 24 |
|-----|-----|----|----|----|----|----|----|----|----|----|----|----|----|----|----|
| C   | #1  |    |    |    |    |    |    |    |    |    |    |    |    |    |    |
|     | #2  |    |    |    |    |    |    |    |    |    |    |    |    |    |    |
|     | #3  |    |    |    |    |    |    |    |    |    |    |    |    |    |    |
|     | #4  |    |    |    |    |    |    |    |    |    |    |    |    |    |    |
|     | #5  |    |    |    |    |    |    |    |    |    |    |    |    |    |    |
|     | #6  |    |    |    |    |    |    |    |    |    |    |    |    |    |    |
|     | #7  |    |    |    |    |    |    |    |    |    |    |    |    |    |    |
|     | #8  |    |    |    |    |    |    |    |    |    |    |    |    |    |    |
|     | #9  |    |    |    |    |    |    |    |    |    |    |    |    |    |    |
|     | #10 |    |    |    |    |    |    |    |    |    |    |    |    |    |    |
|     | #11 |    |    |    |    |    |    |    |    |    |    |    |    |    |    |
|     | #12 |    |    |    |    |    |    |    |    |    |    |    |    |    |    |
|     | #13 |    |    |    |    |    |    |    |    |    |    |    |    |    |    |
|     | #14 |    |    |    |    |    |    |    |    |    |    |    |    |    |    |
|     | #15 |    |    |    |    |    |    |    |    |    |    |    |    |    |    |
|     | #16 |    |    |    |    |    |    |    |    |    |    |    |    |    |    |
| N   | #1  |    |    |    |    |    |    |    |    |    |    |    |    |    |    |
|     | #2  |    |    |    |    |    |    |    |    |    |    |    |    |    |    |
|     | #3  |    |    |    |    |    |    |    |    |    |    |    |    |    |    |
|     | #4  |    |    |    |    |    |    |    |    |    |    |    |    |    |    |
|     | #5  |    |    |    |    |    |    |    |    |    |    |    |    |    |    |
|     | #6  |    |    |    |    |    |    |    |    |    |    |    |    |    |    |
|     | #7  |    |    |    |    |    |    |    |    |    |    |    |    |    |    |
|     | #8  |    |    |    |    |    |    |    |    |    |    |    |    |    |    |
|     | #9  |    |    |    |    |    |    |    |    |    |    |    |    |    |    |
|     | #10 |    |    |    |    |    |    |    |    |    |    |    |    |    |    |
|     | #11 |    |    |    |    |    |    |    |    |    |    |    |    |    |    |
|     | #12 |    |    |    |    |    |    |    |    |    |    |    |    |    |    |
|     | #13 |    |    |    |    |    |    |    |    |    |    |    |    |    |    |
|     | #14 |    |    |    |    |    |    |    |    |    |    |    |    |    |    |
|     | #15 |    |    |    |    |    |    |    |    |    |    |    |    |    |    |
|     | #16 |    |    |    |    |    |    |    |    |    |    |    |    |    |    |

C indicates the control, and N indicates the N-fertilized. Gray bands mean available periods.

| Day |     | 25 | 26 | 27 | 28 | 29 | 30 | 1 | 2 | 3 | 4 | 5 | 6 |
|-----|-----|----|----|----|----|----|----|---|---|---|---|---|---|
| C   | #1  |    |    |    |    |    |    |   |   |   |   |   |   |
|     | #2  |    |    |    |    |    |    |   |   |   |   |   |   |
|     | #3  |    |    |    |    |    |    |   |   |   |   |   |   |
|     | #4  |    |    |    |    |    |    |   |   |   |   |   |   |
|     | #5  |    |    |    |    |    |    |   |   |   |   |   |   |
|     | #6  |    |    |    |    |    |    |   |   |   |   |   |   |
|     | #7  |    |    |    |    |    |    |   |   |   |   |   |   |
|     | #8  |    |    |    |    |    |    |   |   |   |   |   |   |
|     | #9  |    |    |    |    |    |    |   |   |   |   |   |   |
|     | #10 |    |    |    |    |    |    |   |   |   |   |   |   |
|     | #11 |    |    |    |    |    |    |   |   |   |   |   |   |
|     | #12 |    |    |    |    |    |    |   |   |   |   |   |   |
|     | #13 |    |    |    |    |    |    |   |   |   |   |   |   |
|     | #14 |    |    |    |    |    |    |   |   |   |   |   |   |
|     | #15 |    |    |    |    |    |    |   |   |   |   |   |   |
|     | #16 |    |    |    |    |    |    |   |   |   |   |   |   |
| N   | #1  |    |    |    |    |    |    |   |   |   |   |   |   |
|     | #2  |    |    |    |    |    |    |   |   |   |   |   |   |
|     | #3  |    |    |    |    |    |    |   |   |   |   |   |   |
|     | #4  |    |    |    |    |    |    |   |   |   |   |   |   |
|     | #5  |    |    |    |    |    |    |   |   |   |   |   |   |
|     | #6  |    |    |    |    |    |    |   |   |   |   |   |   |
|     | #7  |    |    |    |    |    |    |   |   |   |   |   |   |
|     | #8  |    |    |    |    |    |    |   |   |   |   |   |   |
|     | #9  |    |    |    |    |    |    |   |   |   |   |   |   |
|     | #10 |    |    |    |    |    |    |   |   |   |   |   |   |
|     | #11 |    |    |    |    |    |    |   |   |   |   |   |   |
|     | #12 |    |    |    |    |    |    |   |   |   |   |   |   |
|     | #13 |    |    |    |    |    |    |   |   |   |   |   |   |
|     | #14 |    |    |    |    |    |    |   |   |   |   |   |   |
|     | #15 |    |    |    |    |    |    |   |   |   |   |   |   |
|     | #16 |    |    |    |    |    |    |   |   |   |   |   |   |
